# Supplementary material for: Diffusive nature of thermal transport in stanene
Source: Royal Society of Chemistry journal article supplement (doi:10.1039/c5cp07957h), 2016-01-01
Supplement: c5cp07957h1.pdf [file c5cp07957h1.pdf]

**Electronic Supplementary Information (ESI) for**  
**Diffusive nature of thermal transport in stanene**

Arun S. Nissimagoudar<sup>a</sup>, Aaditya Manjanath<sup>a,b</sup> and Abhishek K. Singh<sup>a,\*</sup>

<sup>a</sup>*Materials Research Centre, Indian Institute of Science, Bangalore - 560012, India and*

<sup>b</sup>*Centre for Nano Science and Engineering,  
Indian Institute of Science, Bangalore - 560012, India*

(Dated: April 6, 2016)

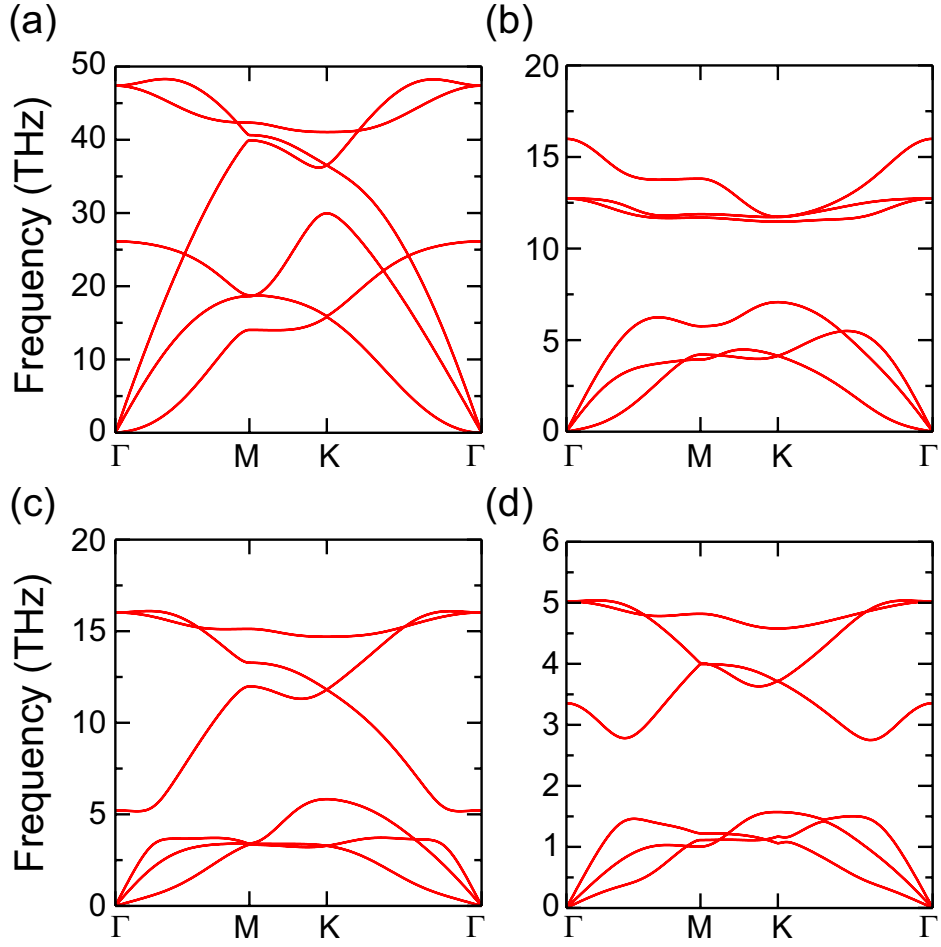

Figure S1. Phonon dispersions along high-symmetry directions for (a) graphene, (b) blue phosphorene, (c) silicene and, (d) stanene.

Table S1. Optimized lattice constant  $a$ , buckling height  $h$  and, nearest-neighbor distance  $d$  for graphene, blue phosphorene, silicene and stanene.

| Material         | $a$ (Å) | $h$ (Å) | $d$ (Å) |
|------------------|---------|---------|---------|
| graphene         | 2.42    | -       | 1.43    |
| blue phosphorene | 3.33    | 1.23    | 2.26    |
| silicene         | 3.87    | 0.44    | 2.28    |
| stanene          | 4.67    | 0.85    | 2.83    |

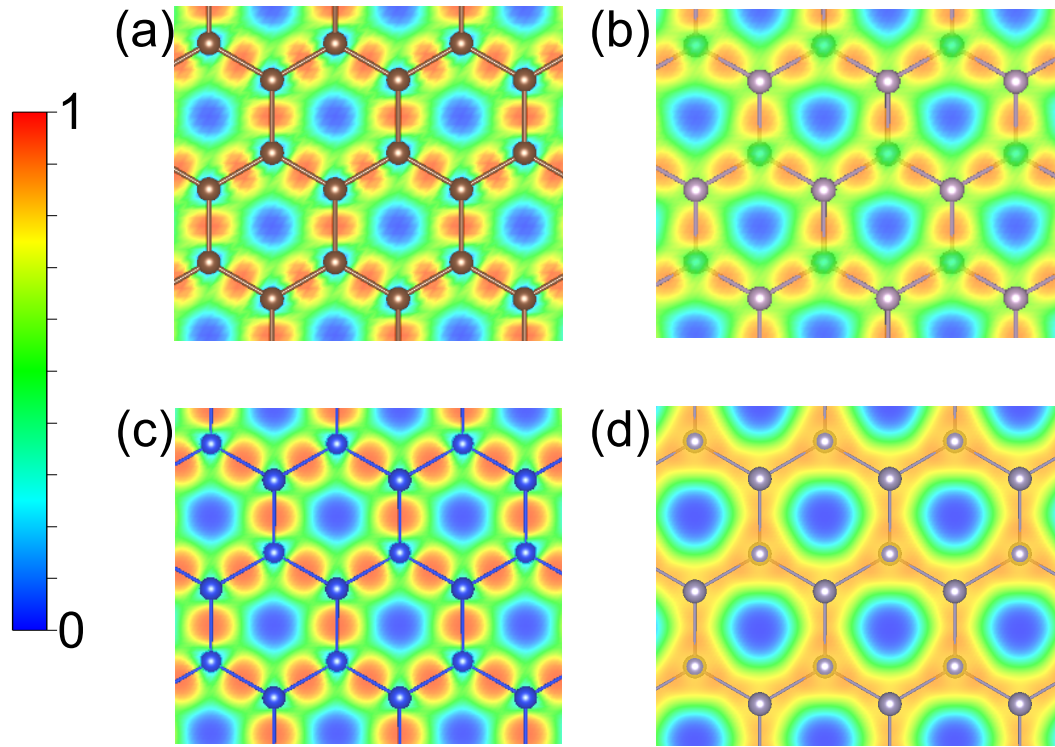

Figure S2. Electron localization function (ELF) for (a) graphene, (b) blue phosphorene, (c) silicene, and (d) stanene (Top view). ELF = 0 indicates no localization and 1, complete localization.
